# Supplementary material for: Identification of Bacterial Protein O-Oligosaccharyltransferases and Their Glycoprotein Substrates
Source: PubMed Central journal article supplement (PMC3643930; doi:10.1371/journal.pone.0062768), 2013-05-03
Supplement: pone.0062768.s006.pdf [file pone.0062768.s006.pdf]

**Table S1.**

| Target protein | Peptide Sequence      |
|----------------|-----------------------|
| ComP           | AGALVAGTPSTAGSSCVGVQE |
| CcoP           | HFLDKDKLHIMTAYV       |
| MetQ           | ENLKNIKIVELEAAQ       |
| Sco            | GGQNLPVIKQQYRVV       |
| Mip            | IGPNATLVFDVKLV        |
| Laz            | TDYVKPDDARVVAHT       |
