# Supplementary material for: Identification of Bacterial Protein O-Oligosaccharyltransferases and Their Glycoprotein Substrates
Source: PubMed Central journal article supplement (PMC3643930; doi:10.1371/journal.pone.0062768), 2013-05-03
Supplement: pone.0062768.s007.pdf [file pone.0062768.s007.pdf]

**Table S2.**

| Protein                      | Name          | Ordered locus name | Uniprot Accession | Peptide coverage | MASCOT score |
|------------------------------|---------------|--------------------|-------------------|------------------|--------------|
| Azurin                       | Laz, azu      | NMB_1533           | F0AG13            | 12 %             | 428          |
| Pilus structural subunit     | PilE, pilin   | NMB_0018           | Q57135            | 21%              | 344          |
| D-methionine binding protein | MetQ, Gna1946 | NMB_1946           | F0A283            | 8 %              | 269          |
