# Supplementary material for: Identification of Bacterial Protein O-Oligosaccharyltransferases and Their Glycoprotein Substrates
Source: PubMed Central journal article supplement (PMC3643930; doi:10.1371/journal.pone.0062768), 2013-05-03
Supplement: pone.0062768.s008.pdf [file pone.0062768.s008.pdf]

**Table S3.**

| Start-<br>end | Observed<br>(m/z)    | Observed<br>(Da) | $\Delta$ Mass<br>(Da) | Sequence             | Ions<br>scores |
|---------------|----------------------|------------------|-----------------------|----------------------|----------------|
| 84-<br>90     | 426.24 <sup>2+</sup> | 850.47           | -0.01                 | K.EFTITLK.H          | 43             |
| 141-<br>156   | 524.28 <sup>3+</sup> | 1569.83          | 0.00                  | K.LIGGGEEASLTLDPAK.L | 82             |
| 141-<br>156   | 785.93 <sup>2+</sup> | 1569.85          | 0.02                  | K.LIGGGEEASLTLDPAK.L | 139            |
