# Supplementary material for: Identification of Bacterial Protein O-Oligosaccharyltransferases and Their Glycoprotein Substrates
Source: PubMed Central journal article supplement (PMC3643930; doi:10.1371/journal.pone.0062768), 2013-05-03
Supplement: pone.0062768.s009.pdf [file pone.0062768.s009.pdf]

**Table S4.**

| Start-end | Observed (m/z)       | Observed (Da) | $\Delta$ Mass (Da) | Sequence                  | Ions scores |
|-----------|----------------------|---------------|--------------------|---------------------------|-------------|
| 31-44     | 486.27 <sup>3+</sup> | 1455.79       | -0.00              | R.AQVSEAILLAEGQK.S        | 56          |
| 31-44     | 728.91 <sup>2+</sup> | 1455.81       | 0.02               | R.AQVSEAILLAEGQK.S        | 114         |
| 127-147   | 707.34 <sup>3+</sup> | 2118.99       | 0.03               | R.NDTDDTVAAVAADNTGNINTK.H | 108         |
