# Supplementary material for: Identification of Bacterial Protein O-Oligosaccharyltransferases and Their Glycoprotein Substrates
Source: PubMed Central journal article supplement (PMC3643930; doi:10.1371/journal.pone.0062768), 2013-05-03
Supplement: pone.0062768.s010.pdf [file pone.0062768.s010.pdf]

**Table S5.**

| Start-<br>end | Observed<br>(m/z)    | Observed<br>(Da) | $\Delta$ Mass<br>(Da) | Sequence         | Ions<br>scores |
|---------------|----------------------|------------------|-----------------------|------------------|----------------|
| 157-<br>168   | 708.41 <sup>2+</sup> | 1414.79          | 0.02                  | R.VLVMLDELGWIK.L | 95             |
| 192-<br>202   | 61986 <sup>2+</sup>  | 1237.70          | 0.01                  | K.IVELEAAQLPR.S  | 86             |
