# Supplementary material for: Identification of Bacterial Protein O-Oligosaccharyltransferases and Their Glycoprotein Substrates
Source: PubMed Central journal article supplement (PMC3643930; doi:10.1371/journal.pone.0062768), 2013-05-03
Supplement: pone.0062768.s011.pdf [file pone.0062768.s011.pdf]

**Table S6.**

| Variant                | Leu358-Lys387 Peptide Sequence                                             |
|------------------------|----------------------------------------------------------------------------|
| WT                     | LSDTAYAGNGAAPAAS <u>S</u> APAAS <u>S</u> APAASASEK                         |
| S373A                  | LSDTAYAGNGAAPAAA <b>A</b> PAASAPAASASEK                                    |
| S378A                  | LSDTAYAGNGAAPAASAPAAA <b>A</b> PAASASEK                                    |
| S373A, S378A           | LSDTAYAGNGAAPAAA <b>A</b> PAAA <b>A</b> PAASASEK                           |
| S373A, S378A,<br>S385P | LSDTAYAGNGAAPAAA <b>A</b> PAAA <b>A</b> PAAS <u>S</u> <b>A</b> <b>P</b> EK |

Underlined S are glycosylated, bold **A** and **P** are changed in variants
